# Supplementary material for: Targeted manipulation of bZIP53 DNA-binding properties influences Arabidopsis metabolism and growth
Source: PubMed Central journal article supplement — J Exp Bot. 2019 Jun 28;70(20):5659–71. doi: 10.1093/jxb/erz309 (PMC6812703; doi:10.1093/jxb/erz309), 2019-06-28
Supplement: erz309_suppl_supplementary_figures_s1-s2_tables_s1-s5.pdf [file erz309_suppl_supplementary_figures_s1-s2_tables_s1-s5.pdf]

## SUPPLEMENTARY DATA (Garg *et al.*)

### Supplementary Figures

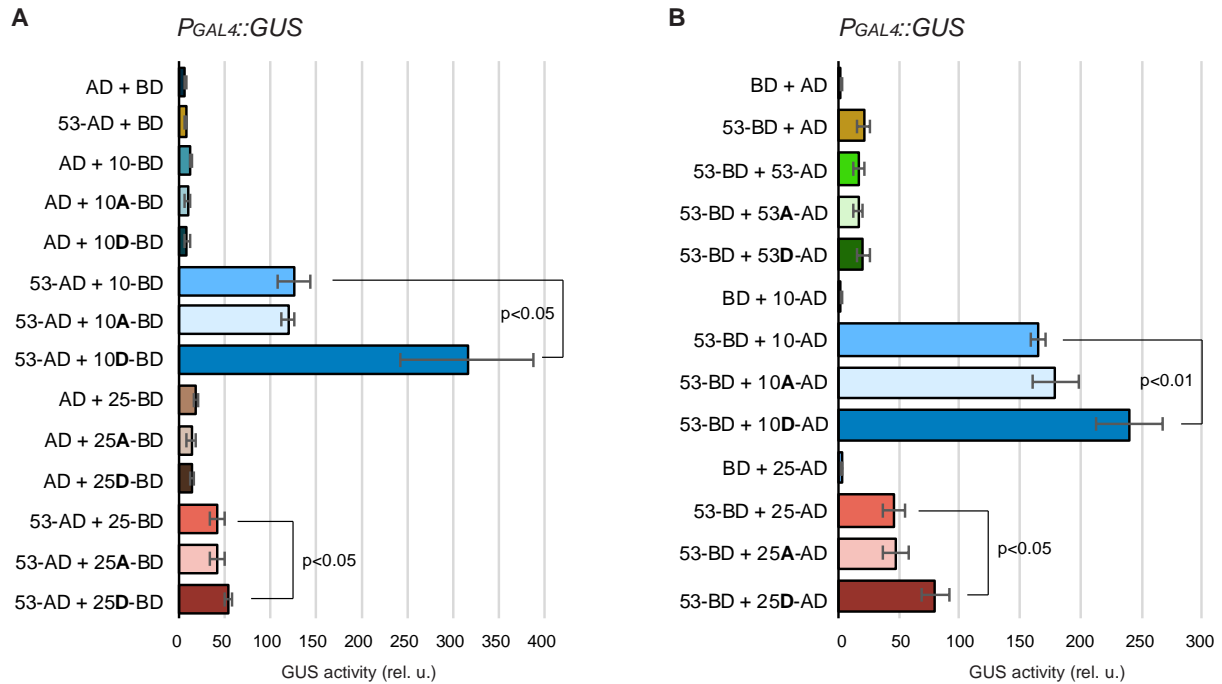

**Fig. S1.** Analysis of the heterodimerization of bZIP53 with bZIP10 and 25 by *protoplast two-hybrid* assay.  $P_{GAL4}:GUS$  is used as reporter. (A) bZIP53 is fused to GAL4 activation domain (AD); bZIP10, 25 and their mutated forms are fused to GAL4 DNA-binding domain (BD). (B) Reciprocal assays applying bZIP53 as BD-fusion, and bZIP10, 25, their mutated forms and bZIP53 mutated forms as AD-fusions. **A**: substitution of Ser15 and Ser19 to Ala, **D**: substitution of Ser15 and Ser19 to Asp.

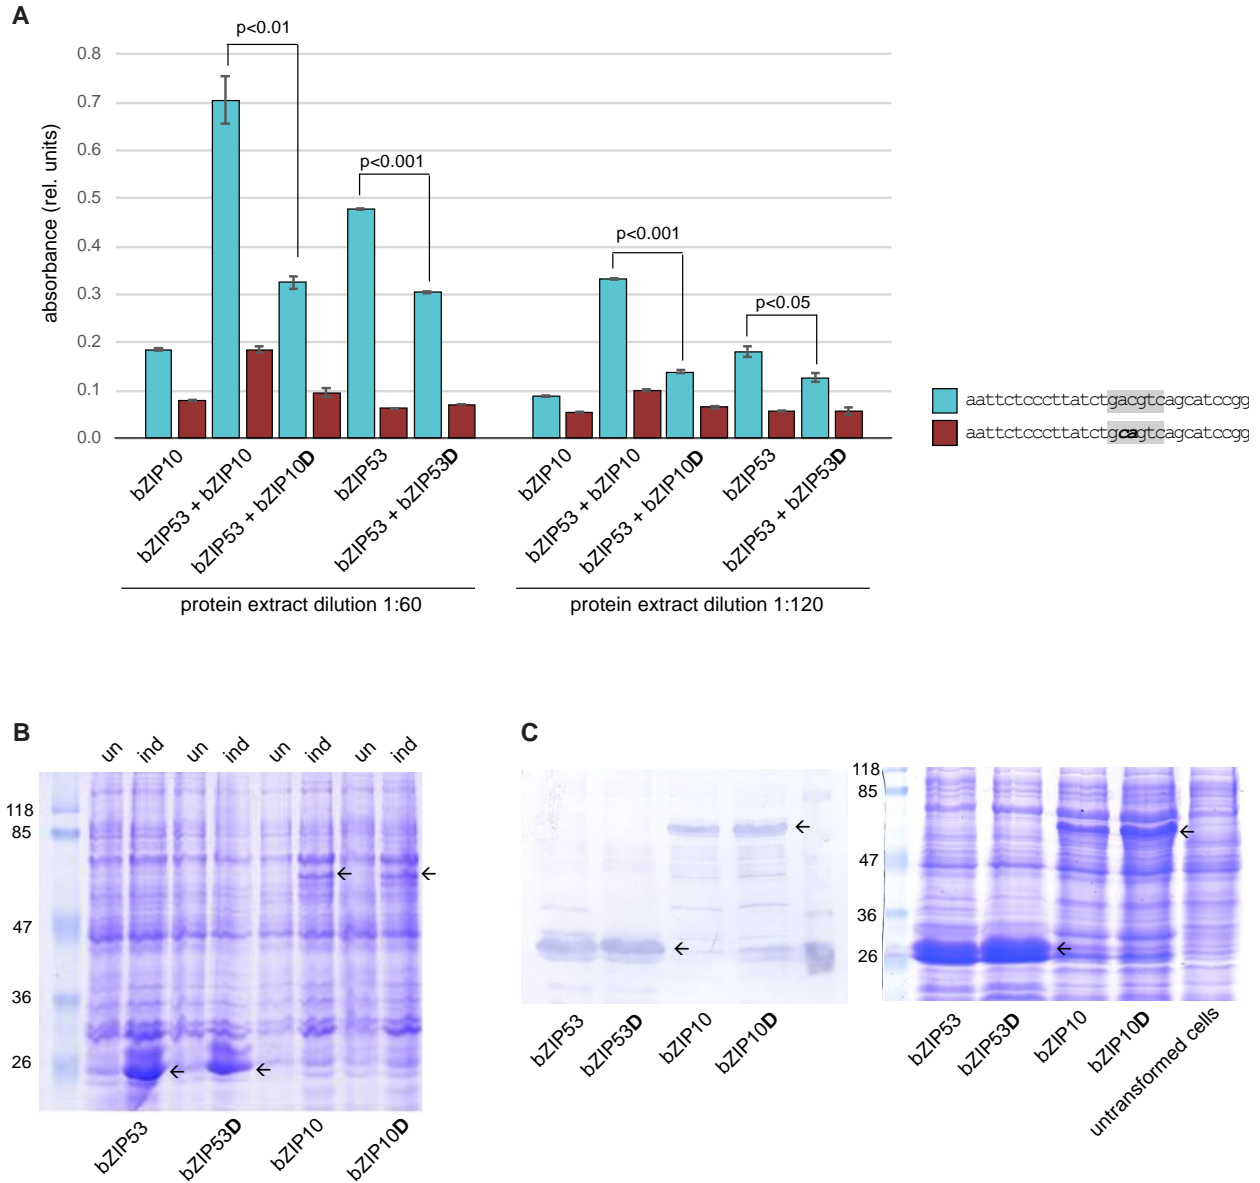

**Fig. S2.** Binding of bZIP heterodimers to the cognate DNA sequence. (A) DPI-ELISA of the interaction of the bZIP53-bZIP10 heterodimers and corresponding mutated forms to the C-box (blue bars) and mutated C-box (dark-red bars). The recombinant C-terminally His-tagged proteins were extracted from *E. coli* under denatured conditions in the DNA-binding buffer containing 6 M urea, mixed as indicated on the X-axis and heated for 3-4 min at 50°C, following by stepwise dilutions in the DNA-binding buffer. The final protein dilutions were 1:60 and 1:120. Data are presented as mean values  $\pm$  standard deviation (StD);  $n=2$ . (B) The expression of the recombinant proteins was verified by the Coomassie staining of total protein extracts separated by SDS-polyacrylamide gels. (C) The detection of corresponding bZIP proteins (indicated by arrows) in the denatured extracts by the Coomassie staining (right panel) and western blotting using monoclonal mouse anti-His antibody (Roche) and anti-mouse-AP conjugate (BioRad). **D**: substitution of Ser15,Ser19 to Asp; un: uninduced; ind: induced.

## Supplementary Tables

**Table S1:** Primer sequences used for Gateway cloning and mutagenesis.

| Construct                     | Primer Sequences                                                                     |
|-------------------------------|--------------------------------------------------------------------------------------|
| pENTR/bZIP53                  | 5'- CACCATGGGGTCGTTGCAAATG -3'<br>5'- GCAATCAAACATATCTGCAGAAGCTCTGATT -3'            |
| <b>Construct and mutation</b> |                                                                                      |
| bZIP10 <sup>S15,19A</sup>     | 5'-AATCGTGAGGCAGCTAGGCGAGCTAGAAGGAGAA-3'<br>5'-TTCTCCTTCTAGCTCGCCTAGCTGCCTCACGATT-3' |
| bZIP10 <sup>S15,19D</sup>     | 5'-AATCGTGAGGATGCTAGGCGAGATAGAAGGAGAA-3'<br>5'-TTCTCCTTCTATCTCGCCTAGCATCCTCACGATT-3' |
| bZIP25 <sup>S15,19A</sup>     | 5'-GAAGCCGCTAGGCGCGCTAGGAGAAGAAAGCAAG-3'<br>5'-CTTGCTTTCTTCTCCTAGCGCGCCTAGCGGCTTC-3' |
| bZIP25 <sup>S15,19D</sup>     | 5'-GAAGACGCTAGGCGCGATAGGAGAAGAAAGCAAG-3'<br>5'-CTTGCTTTCTTCTCCTATCGCGCCTAGCGTCTTC-3' |
| bZIP53 <sup>S15,19A</sup>     | 5'-AGAGAAGCTGCTCGGAGGGCAAGGATGAGGAAAC-3'<br>5'-GTTTCCTCATCCTTGCCCTCCGAGCAGCTTCTCT-3' |
| bZIP53 <sup>S15,19D</sup>     | 5'-AGAGAAGATGCTCGGAGGGATAGGATGAGGAAAC-3'<br>5'-GTTTCCTCATCCTATCCCTCCGAGCATCTTCTCT-3' |

**Table S2:** Primer sequences used for qPCR.

| Gene              | Primer Sequence                                        | Product size (nt) |
|-------------------|--------------------------------------------------------|-------------------|
| <i>ProDH1</i>     | GCTGCCAAATCTTTACCAACA<br>TGAAGTTCGGACTTTTGTATTCC       | 127               |
| <i>ProDH2</i>     | AGCTACGCATAACACAGACTCG<br>TTATTGATCCCTAGCTCACTTGC      | 66                |
| <i>BCAT2</i>      | TCACAAATTATGCGCCAGTT<br>CGAGATAAAGAACGTCTGAAAACC       | 75                |
| <i>bZIP53</i>     | CAATGTCTTGAGGGCACAGG<br>TGCATTGGACAAGGCATCTG           | 156               |
| <i>UBI10</i>      | TCACCGGAAAGACCATCACT<br>CGGTGGGATACCCTCTTTG            | 92                |
| <i>EF-1-alpha</i> | GTAACAAGATGGATGCCACCACCCC<br>TCCCTCGAATCCAGAGATTGGCACA | 140               |

**Table S3:** Oligonucleotides used for the protein-DNA binding assay.

| Oligo-label | Sequence                                                                           |
|-------------|------------------------------------------------------------------------------------|
| C-box       | 5' -biotAATTCTCCCTTATCTGACGTCAGCATCCGG-3'<br>3' -TTAAGAGGGAATAGACTGCAGTCGTAGGCC-5' |
| C-mut       | 5' -biotAATTCTCCCTTATCTGACGTCAGCATCCGG-3'<br>3' -TTAAGAGGGAATAGACGTCAGTCGTAGGCC-5' |

**Table S4:** Accession numbers of gene sequences used in this study.

| Gene name         | Accession number* |
|-------------------|-------------------|
| <i>bZIP10</i>     | At4G02640         |
| <i>bZIP25</i>     | At3G54620         |
| <i>bZIP53</i>     | AT3G62420         |
| <i>BCAT2</i>      | AT1G10070         |
| <i>ProDH1</i>     | AT3G30775         |
| <i>ProDH2</i>     | AT5G38710         |
| <i>EF-1-alpha</i> | AT5G60390         |
| <i>UBQ10</i>      | AT4G05320         |

\*Sequence data can be found in the Arabidopsis Genome Initiative or GenBank/EMBL databases

**Table S5.** Summary of amino acid analysis in seven weeks old *Arabidopsis* leaf rosettes harvested at the dawn ( $\mu\text{M}/\text{mg}$  of dry weight).

| <i>p</i> | StDev | mean   | <b>bZIP53ox</b> |        |        |        |        |       | StDev  | mean   | Col-0  | a. a.               |
|----------|-------|--------|-----------------|--------|--------|--------|--------|-------|--------|--------|--------|---------------------|
| 0,164    | 1,64  | 19,03  | 16,54           | 18,62  | 17,88  | 23,13  | 18,97  | 3,35  | 23,05  | 18,26  | 22,82  | <b>Ala</b>          |
| 0,023    | 0,16  | 5,94   | 6,02            | 6,13   | 6,05   | 5,58   | 5,90   | 1,18  | 7,93   | 8,73   | 8,91   | <b>Arg</b>          |
| 0,261    | 1,68  | 21,84  | 20,48           | 21,51  | 19,83  | 21,34  | 26,02  | 1,94  | 19,49  | 16,70  | 22,40  | <b>Asn</b>          |
| 0,022    | 5,34  | 52,09  | 55,58           | 47,90  | 46,87  | 61,96  | 48,15  | 5,70  | 67,84  | 59,30  | 68,99  | <b>Asp</b>          |
| 0,003    | 7,15  | 75,53  | 76,27           | 58,20  | 83,77  | 84,41  | 74,99  | 6,49  | 41,42  | 31,69  | 46,74  | <b>Gln</b>          |
| 0,003    | 9,65  | 151,89 | 155,66          | 144,62 | 135,03 | 159,12 | 165,01 | 0,93  | 186,75 | 185,74 | 186,37 | <b>Glu</b>          |
| 0,021    | 0,93  | 3,28   | 5,25            | 2,71   | 2,84   | 3,64   | 1,98   | 0,23  | 5,62   | 5,28   | 5,79   | <b>Gly</b>          |
| 0,005    | 0,10  | 2,09   | 2,20            | 2,00   | 2,06   | 1,96   | 2,22   | 0,75  | 3,90   | 4,36   | 4,56   | <b>His</b>          |
| 0,000    | 0,12  | 1,21   | 1,26            | 1,35   | 1,31   | 1,21   | 0,90   | 0,46  | 3,31   | 3,74   | 3,56   | <b>Ile</b>          |
| 0,000    | 0,35  | 1,52   | 1,95            | 1,79   | 0,64   | 1,56   | 1,67   | 0,54  | 4,45   | 5,03   | 4,67   | <b>Leu</b>          |
| 0,000    | 0,21  | 1,79   | 2,12            | 1,72   | 1,98   | 1,48   | 1,66   | 0,14  | 3,39   | 3,46   | 3,53   | <b>Lys</b>          |
| 0,840    | 0,24  | 0,74   | 1,13            | 0,45   | 0,95   | 0,73   | 0,46   | 0,22  | 0,79   | 1,08   | 0,46   | <b>Met/<br/>Cys</b> |
| 0,001    | 0,27  | 1,55   | 1,78            | 1,79   | 0,88   | 1,66   | 1,62   | 0,15  | 3,03   | 3,26   | 2,86   | <b>Phe</b>          |
| 0,000    | 0,48  | 4,77   | 4,12            | 5,02   | 4,22   | 5,10   | 5,38   | 0,50  | 8,59   | 8,96   | 8,97   | <b>Pro</b>          |
| 0,007    | 2,90  | 29,69  | 33,08           | 31,63  | 31,59  | 24,86  | 27,27  | 0,36  | 38,05  | 37,98  | 38,59  | <b>Ser</b>          |
| 0,035    | 4,69  | 32,33  | 37,63           | 38,77  | 31,87  | 28,15  | 25,23  | 2,06  | 22,30  | 20,10  | 21,42  | <b>Thr</b>          |
| 0,011    | 0,21  | 0,71   | 0,74            | 0,76   | 1,13   | 0,59   | 0,31   | 0,22  | 1,52   | 1,82   | 1,55   | <b>Tyr</b>          |
| 0,004    | 1,14  | 0,82   | 0,10            | 0,10   | 0,10   | 0,10   | 3,68   | 1,72  | 6,95   | 9,52   | 6,06   | <b>Val</b>          |
| 0,026    | 15,80 | 406,79 | 421,90          | 385,06 | 389,00 | 426,58 | 411,39 | 15,58 | 448,39 | 425,02 | 458,26 | <b>total</b>        |

**Table S5.** (continue)

| <i>p</i> | StDev | mean          | <b>bZIP53<sup>S15,19D</sup>Ox</b> |        |        | <i>p</i> | StDev  | mean  | <b>bZIP53<sup>S15,19A</sup>Ox</b> |               |        | a. a.  |        |        |        |                     |
|----------|-------|---------------|-----------------------------------|--------|--------|----------|--------|-------|-----------------------------------|---------------|--------|--------|--------|--------|--------|---------------------|
| 0,578    | 1,64  | <b>21,62</b>  | 21,87                             | 20,11  | 22,59  | 19,03    | 24,52  | 0,021 | 1,16                              | <b>15,91</b>  | 16,15  | 16,46  | 17,07  | 16,87  | 13,02  | <b>Ala</b>          |
| 0,427    | 1,52  | <b>9,00</b>   | 11,24                             | 10,55  | 7,98   | 7,09     | 8,14   | 0,789 | 0,39                              | <b>7,73</b>   | 8,03   | 7,47   | 7,10   | 7,66   | 8,41   | <b>Arg</b>          |
| 0,022    | 6,11  | <b>33,09</b>  | 28,83                             | 25,65  | 29,53  | 41,51    | 39,95  | 0,081 | 3,05                              | <b>25,61</b>  | 33,23  | 25,27  | 23,74  | 24,21  | 21,61  | <b>Asn</b>          |
| 0,066    | 6,61  | <b>81,60</b>  | 77,19                             | 85,11  | 78,56  | 72,51    | 94,63  | 0,356 | 3,33                              | <b>63,61</b>  | 61,49  | 66,85  | 57,96  | 68,69  | 63,04  | <b>Asp</b>          |
| 0,055    | 43,32 | <b>112,05</b> | 78,98                             | 76,31  | 72,56  | 169,39   | 162,99 | 0,005 | 3,93                              | <b>62,49</b>  | 60,69  | 69,04  | 62,78  | 65,45  | 54,46  | <b>Gln</b>          |
| 0,880    | 11,24 | <b>185,22</b> | 176,43                            | 185,18 | 174,11 | 177,07   | 213,33 | 0,037 | 7,78                              | <b>204,44</b> | 207,50 | 214,10 | 185,89 | 203,54 | 211,16 | <b>Glu</b>          |
| 0,457    | 1,45  | <b>4,77</b>   | 7,42                              | 3,93   | 5,76   | 3,48     | 3,28   | 0,000 | 0,51                              | <b>2,28</b>   | 2,13   | 3,55   | 1,79   | 2,22   | 1,72   | <b>Gly</b>          |
| 0,268    | 0,53  | <b>4,59</b>   | 5,08                              | 4,72   | 4,10   | 3,75     | 5,30   | 0,061 | 0,26                              | <b>2,84</b>   | 3,31   | 2,55   | 2,85   | 2,48   | 3,00   | <b>His</b>          |
| 0,176    | 1,08  | <b>4,75</b>   | 7,31                              | 4,06   | 4,89   | 3,50     | 3,99   | 0,018 | 0,31                              | <b>2,23</b>   | 2,75   | 1,97   | 1,96   | 1,97   | 2,48   | <b>Ile</b>          |
| 0,166    | 1,16  | <b>6,09</b>   | 8,99                              | 5,26   | 6,00   | 4,98     | 5,21   | 0,002 | 0,34                              | <b>2,41</b>   | 2,76   | 2,10   | 2,17   | 2,12   | 2,93   | <b>Leu</b>          |
| 0,110    | 0,97  | <b>4,97</b>   | 7,34                              | 3,72   | 5,02   | 4,18     | 4,61   | 0,050 | 0,41                              | <b>2,65</b>   | 3,01   | 2,17   | 2,31   | 2,43   | 3,32   | <b>Lys</b>          |
| 0,300    | 0,10  | <b>0,62</b>   | 0,47                              | 0,55   | 0,57   | 0,67     | 0,82   | 0,710 | 0,56                              | <b>0,98</b>   | 0,70   | 0,67   | 2,38   | 0,35   | 0,80   | <b>Met/<br/>Cys</b> |
| 0,097    | 0,54  | <b>3,97</b>   | 5,33                              | 3,29   | 3,71   | 3,62     | 3,92   | 0,415 | 0,31                              | <b>2,78</b>   | 3,55   | 2,73   | 2,54   | 2,30   | 2,76   | <b>Phe</b>          |
| 0,047    | 0,99  | <b>10,97</b>  | 12,99                             | 8,71   | 11,37  | 10,77    | 11,01  | 0,000 | 0,75                              | <b>2,88</b>   | 1,96   | 1,94   | 3,65   | 2,92   | 3,95   | <b>Pro</b>          |
| 0,066    | 6,33  | <b>48,33</b>  | 57,29                             | 39,17  | 46,02  | 55,21    | 43,97  | 0,087 | 3,45                              | <b>32,95</b>  | 32,10  | 29,85  | 28,28  | 37,08  | 37,45  | <b>Ser</b>          |
| 0,019    | 2,34  | <b>28,94</b>  | 29,55                             | 27,11  | 30,91  | 24,92    | 32,20  | 0,001 | 4,15                              | <b>41,73</b>  | 47,20  | 45,58  | 35,67  | 42,77  | 37,40  | <b>Thr</b>          |
| 0,250    | 0,52  | <b>2,13</b>   | 3,43                              | 1,48   | 2,14   | 2,01     | 1,59   | 0,027 | 0,17                              | <b>1,00</b>   | 1,14   | 1,14   | 0,74   | 0,82   | 1,14   | <b>Tyr</b>          |
| 0,255    | 1,36  | <b>8,70</b>   | 10,95                             | 6,85   | 9,86   | 8,46     | 7,39   | 0,029 | 2,17                              | <b>1,91</b>   | 4,07   | 0,10   | 0,11   | 0,10   | 5,17   | <b>Val</b>          |
| 0,023    | 54,45 | <b>571,43</b> | 550,72                            | 511,77 | 515,67 | 612,15   | 666,83 | 0,127 | 16,02                             | <b>477,08</b> | 491,78 | 493,57 | 438,99 | 483,97 | 473,82 | <b>total</b>        |
